# Supplementary material for: G9a-mediated repression of CDH10 in hypoxia enhances breast tumour cell motility and associates with poor survival outcome
Source: PubMed Central journal article supplement (PMC7150496; doi:10.7150/thno.41453), 2020-03-15
Supplement: thnov10p4515s1.pdf [file thnov10p4515s1.pdf]

**A**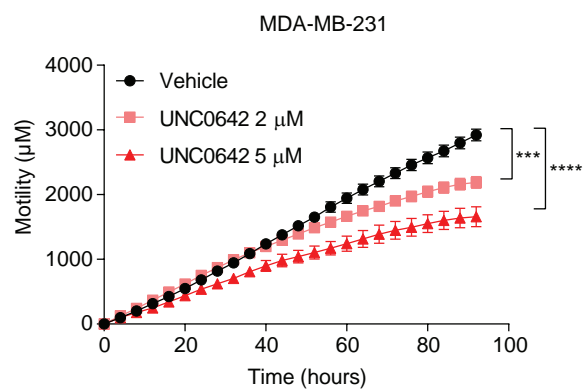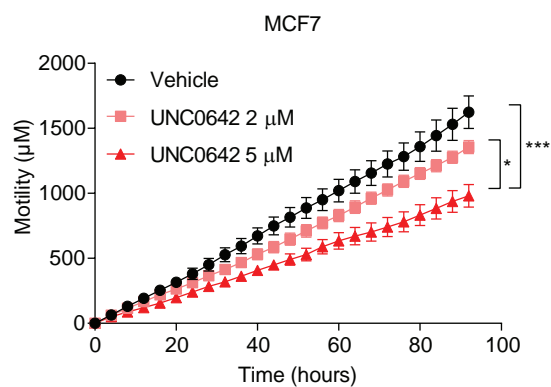**B**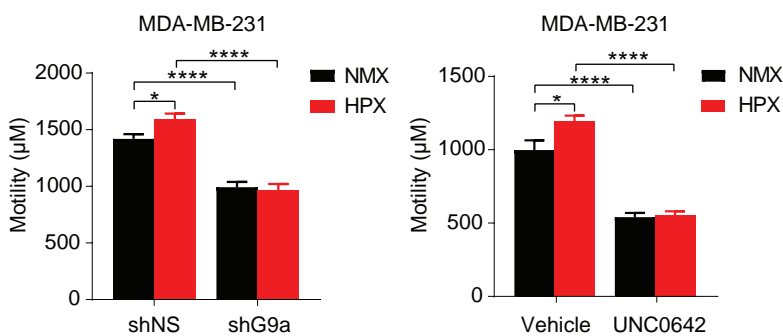**C**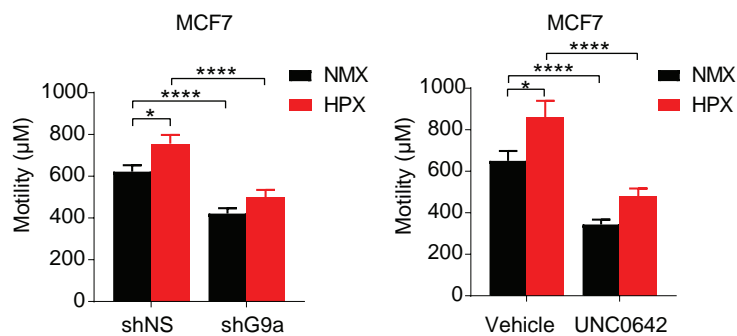**Figure S1**

(A) Holomonitor analysis of cellular motility in MCF7 and MDA-MB-231 cell lines following treatment with UNC0642 (2 or 5  $\mu\text{M}$ ) for 96 hours. (B) Bar graph representing the total distance covered by MDA-MB-231 and (C) MCF7 tracked through holographic microscopy for 48 hours under normoxic (21%  $\text{O}_2$ ) or hypoxic (1%  $\text{O}_2$ ) conditions, following G9a knock down or UNC0642 treatment (5  $\mu\text{M}$ ). Data are represented as mean  $\pm$  SEM (One-way ANOVA, \*  $p < 0.05$ , \*\*\*  $p < 0.0005$ , \*\*\*\*  $p < 0.0001$ ).

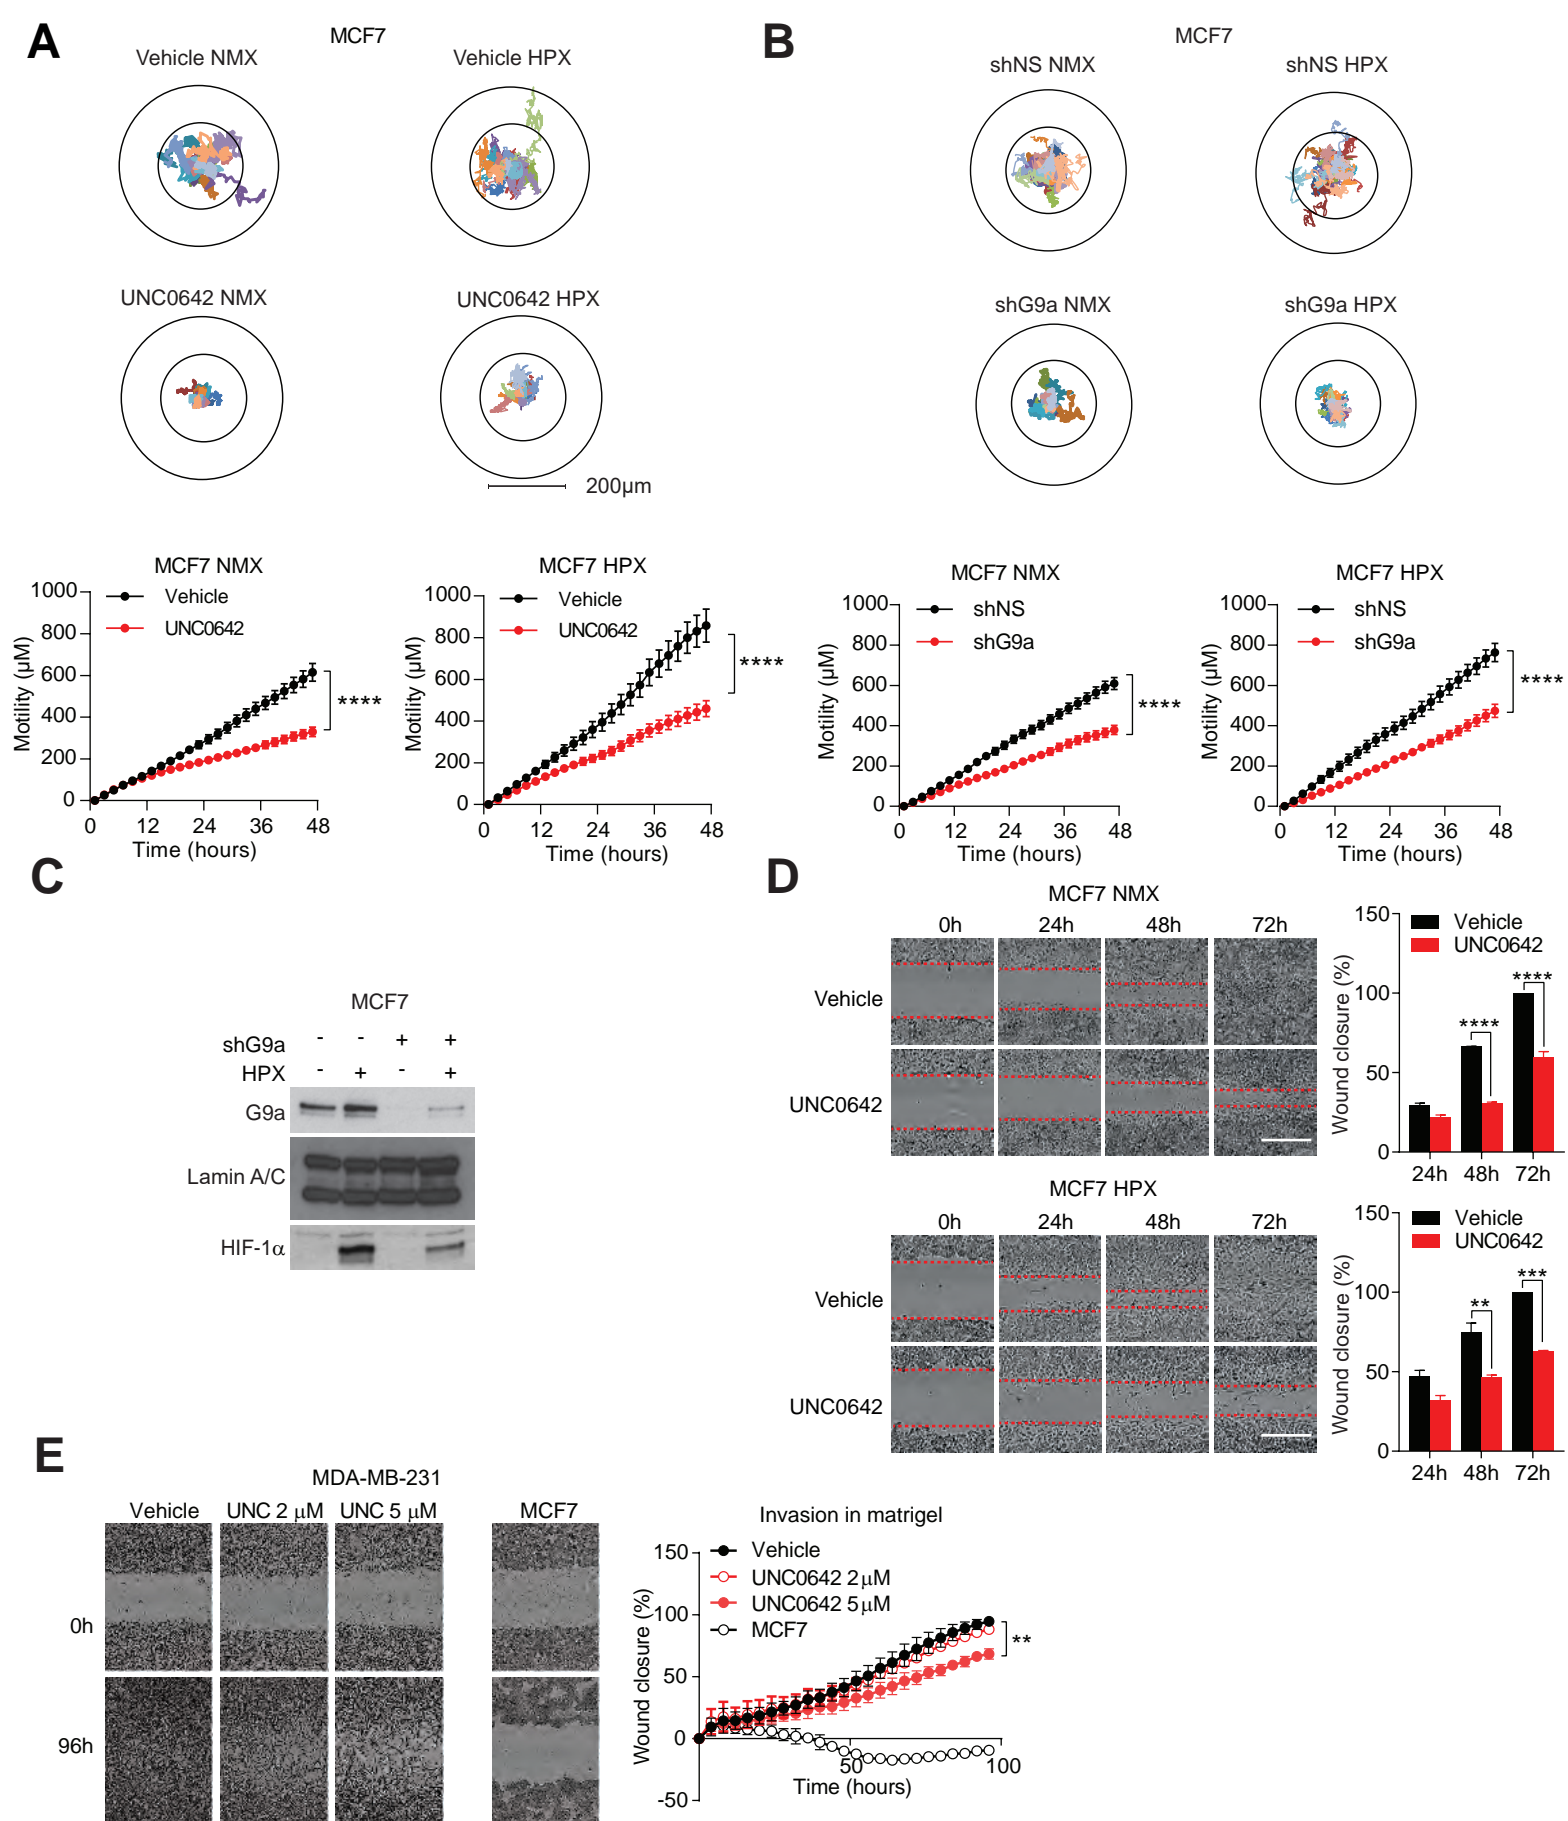

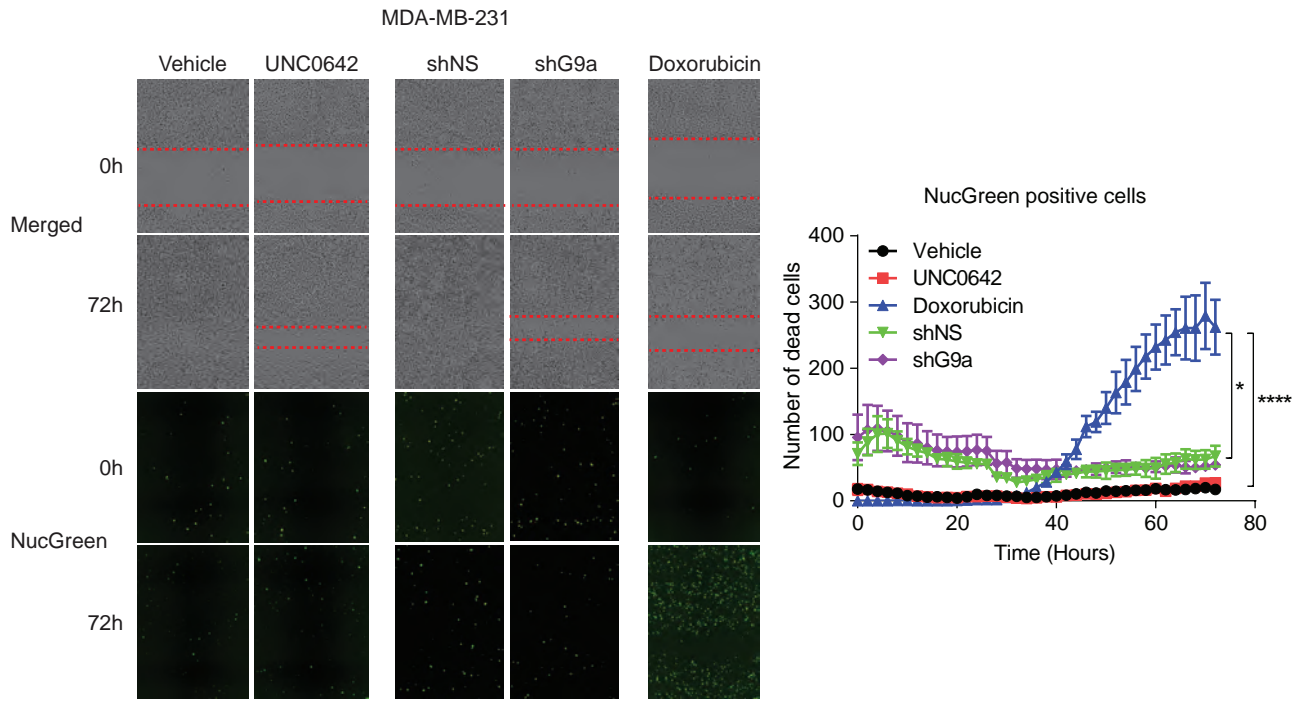

**Figure S3**  
 Scratch wound healing assay in MDA-MB-231 cells treated with UNC0642 (5  $\mu$ M) or following G9a KD in the presence of NucGreen dead cells stain. Top phase-contrast images are merged with Green channel. Bottom images show only the relative green signal. Graph represents NucGreen quantification over time. Doxorubicin (1  $\mu$ M) was used as positive control. Data are represented as mean  $\pm$  SEM (non-parametric, Student's t-test), \*  $p < 0.05$ , \*\*\*\*  $p < 0.0001$ ).

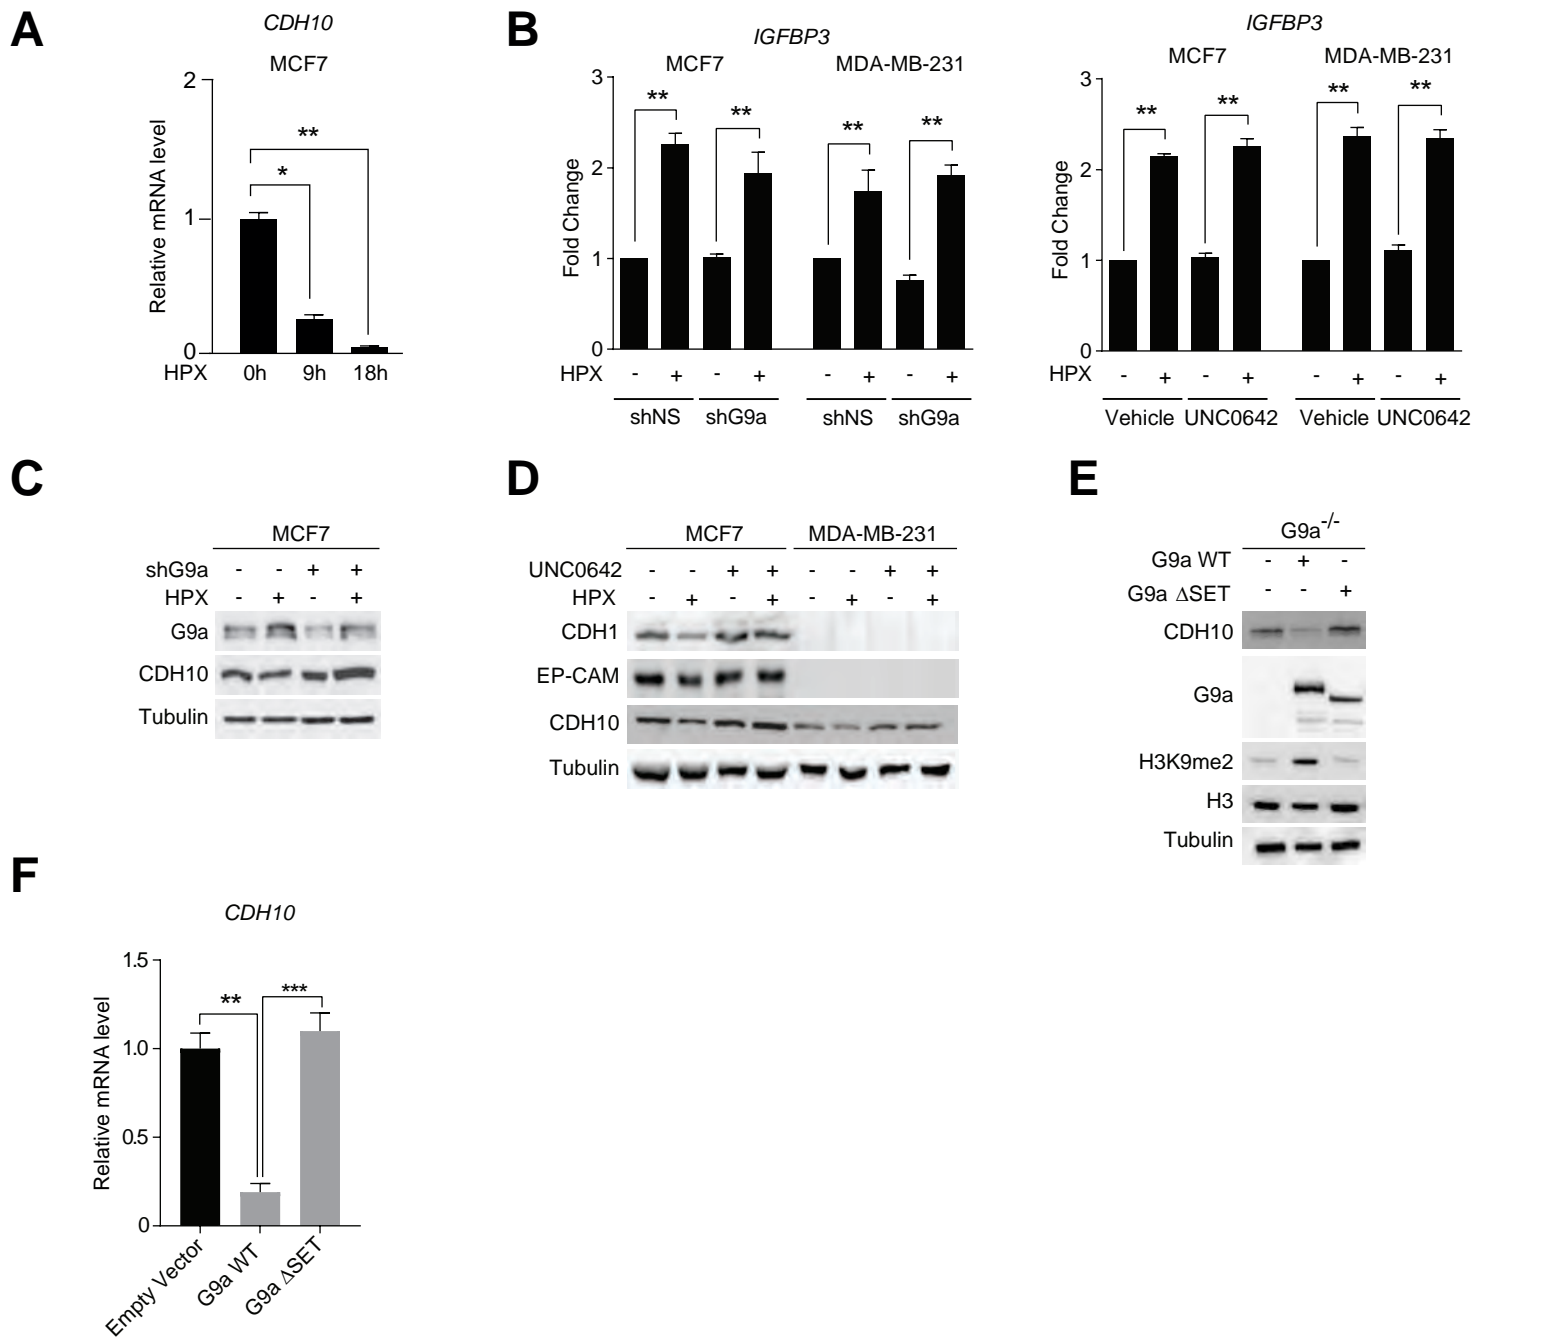

**Figure S4.** (A) *CDH10* expression in MCF7 cells cultured under hypoxic conditions for the indicated times. (B) *IGFBP3* expression evaluated in MDA-MB-231 and MCF7 cells as positive control for the hypoxic environment. (C) Western Immunoblotting analysis of *CDH10* in MCF7 cells transfected with shG9a and exposed to normoxia or hypoxia for 24 hours. (D) Western Immunoblotting analysis of *CDH1*, *EpCAM* and *CDH10* in MCF7 and MDA-MB-231 following exposure to normoxia or hypoxia for 24 hours in the presence or in the absence of UNC0642 (5  $\mu$ M). (E) Western immunoblotting analysis of *CDH10* and H3K9me2 in *G9a*<sup>-/-</sup> MEFs transfected with WT *G9a* or *G9a*  $\Delta$ SET. (F) *CDH10* mRNA levels in *G9a*<sup>-/-</sup> MEFs transfected as described. Data are represented as mean  $\pm$  SEM (non-parametric, Student's t-test), \*  $p < 0.05$ , \*\*  $p < 0.005$ , \*\*\*  $p < 0.005$ .

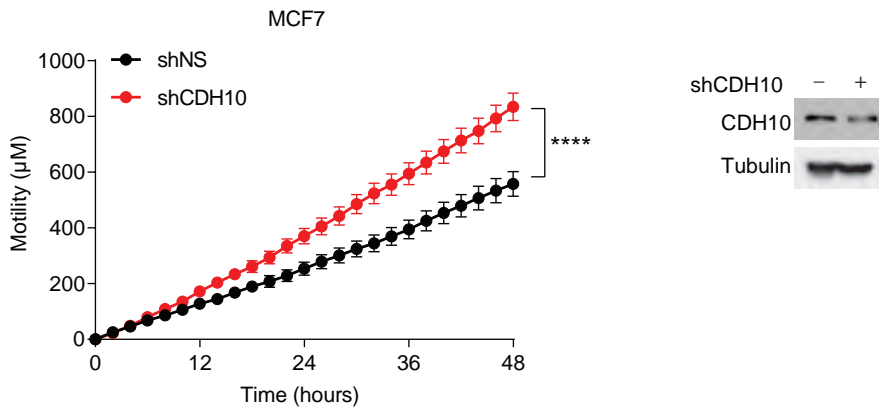

**Figure S5.** Evaluation of the migratory distance covered in 48 hours by MCF7 following CDH10 KD using the HoloMonitor M4. Data are represented as mean  $\pm$  SEM (non-parametric, Student's t-test), \*\*\*\*  $p < 0.0001$ .

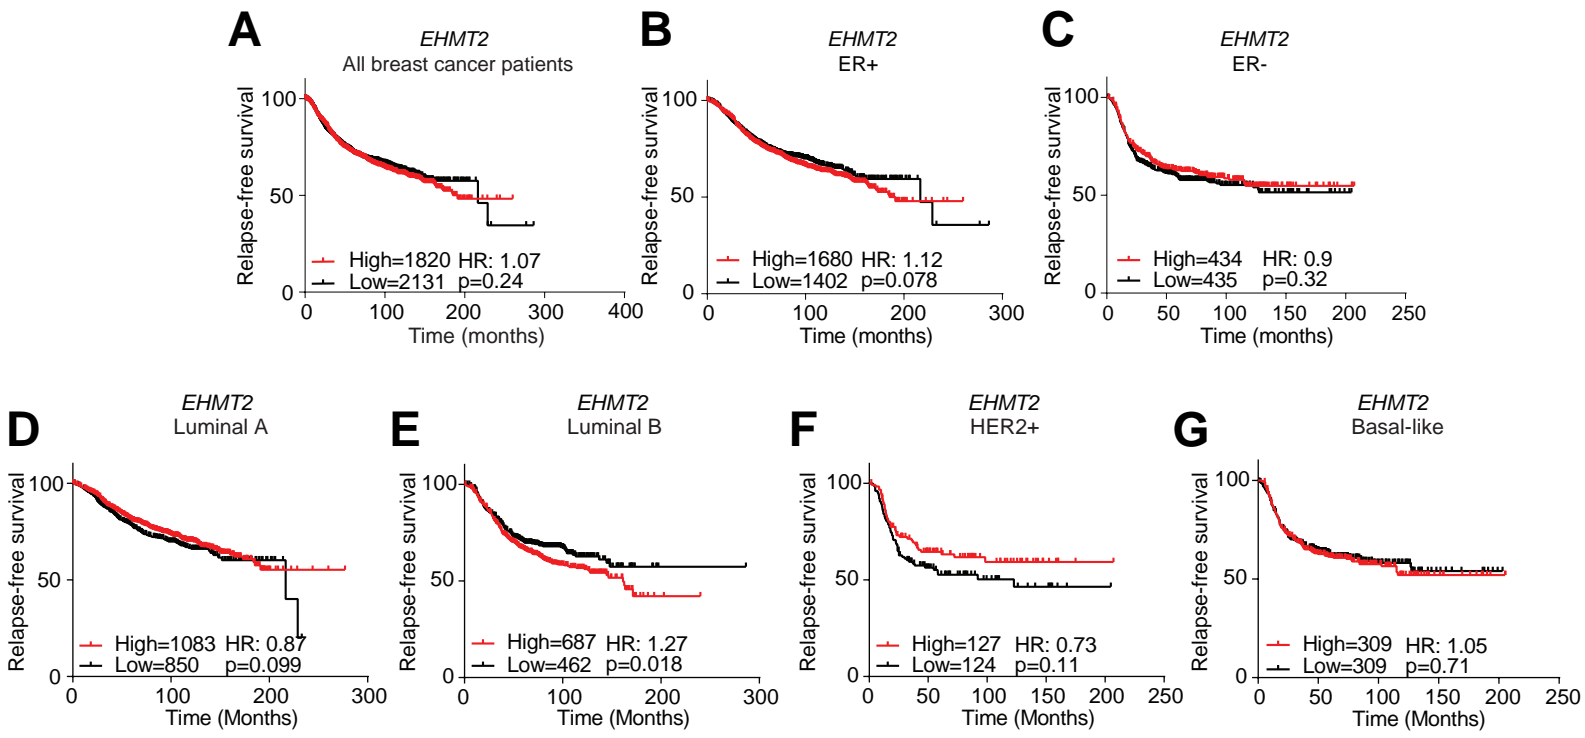

**Figure S6.** Kaplan-Meier relapse-free survival analysis of *EHM2* expression in (A) all breast cancer patients, (B) ER+, (C) ER-, (D) luminal A, (E) luminal B, (F) HER2+ and (G) basal-like.

**A**

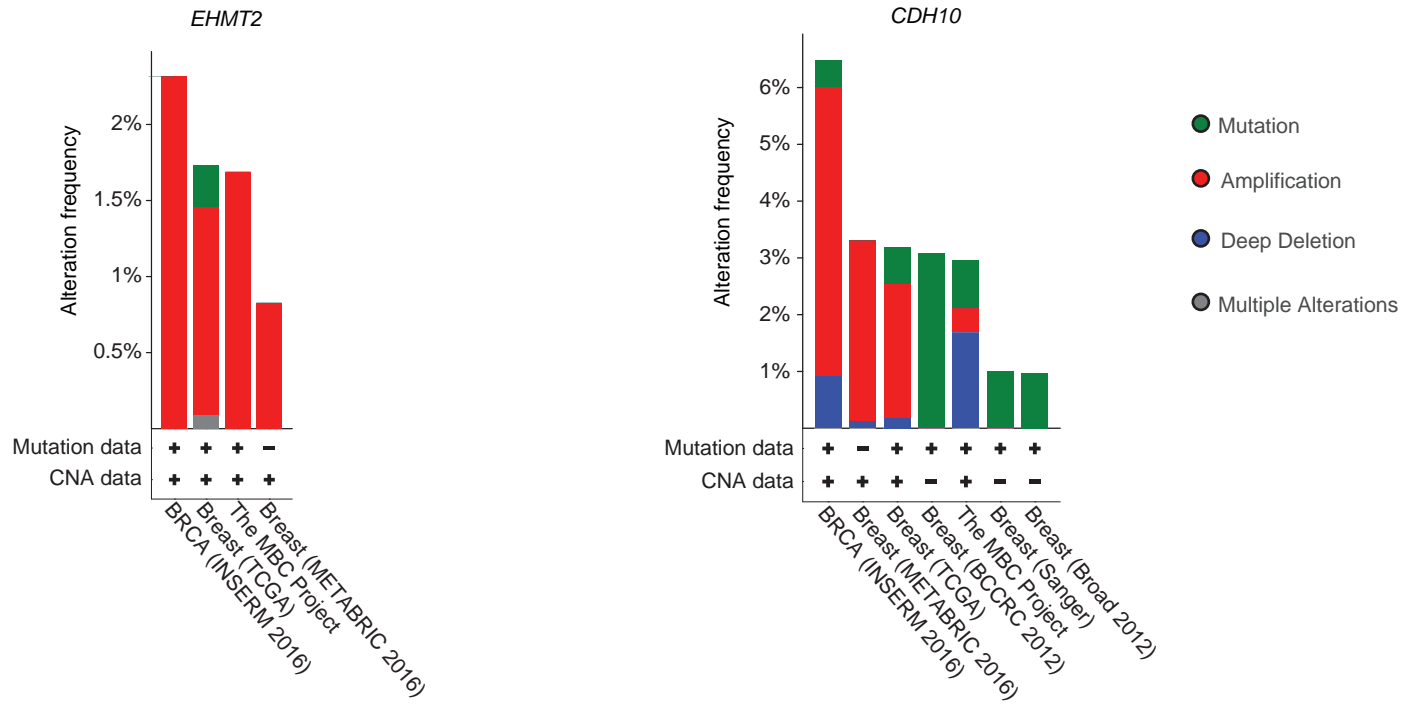

**B**

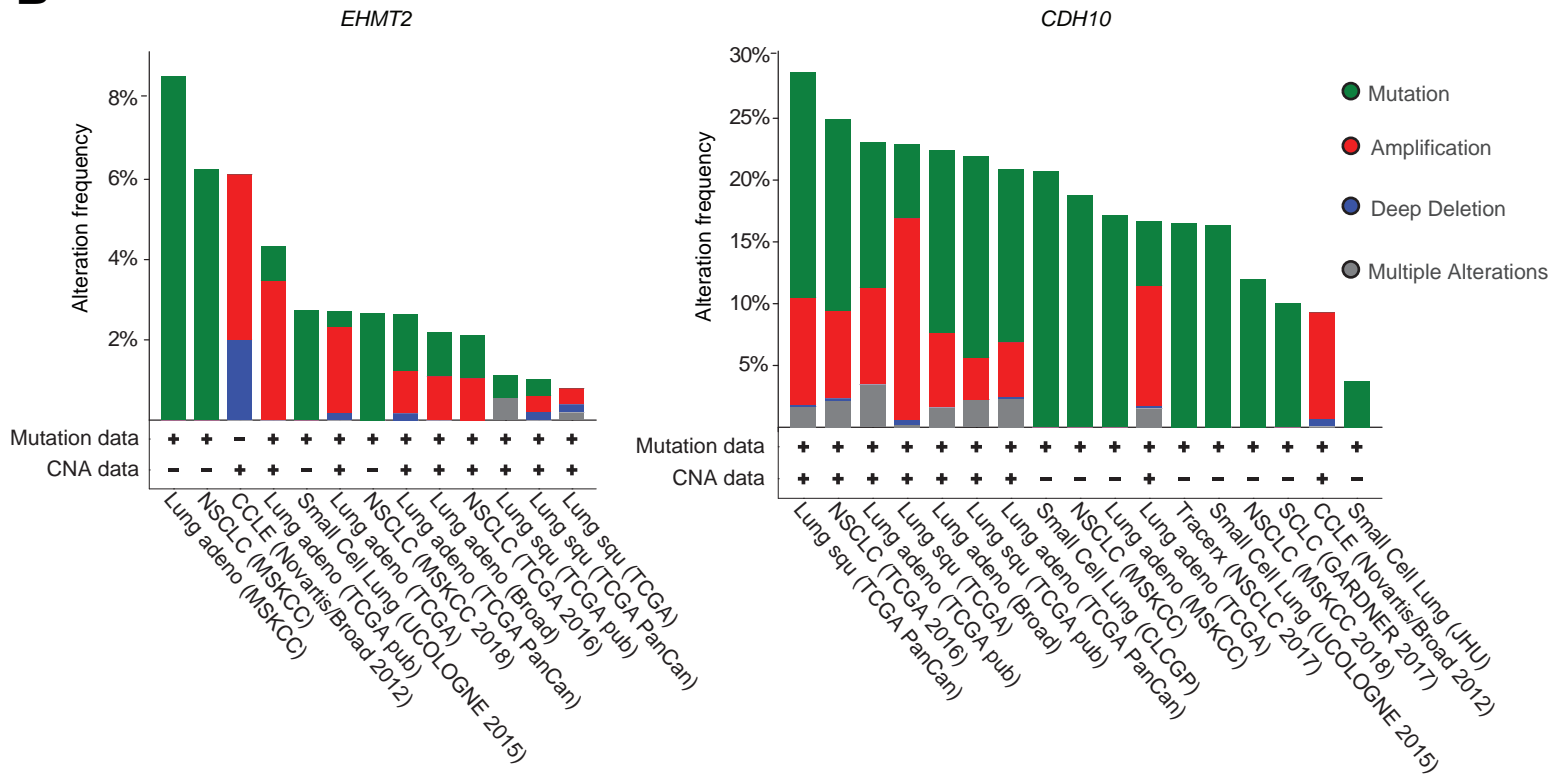

**Figure S7.** (A) Percentage and type of alterations in the *EHMT2* and *CDH10* genes in breast cancer patients and (B) lung cancer patients, subdivided by cancer study.

**A**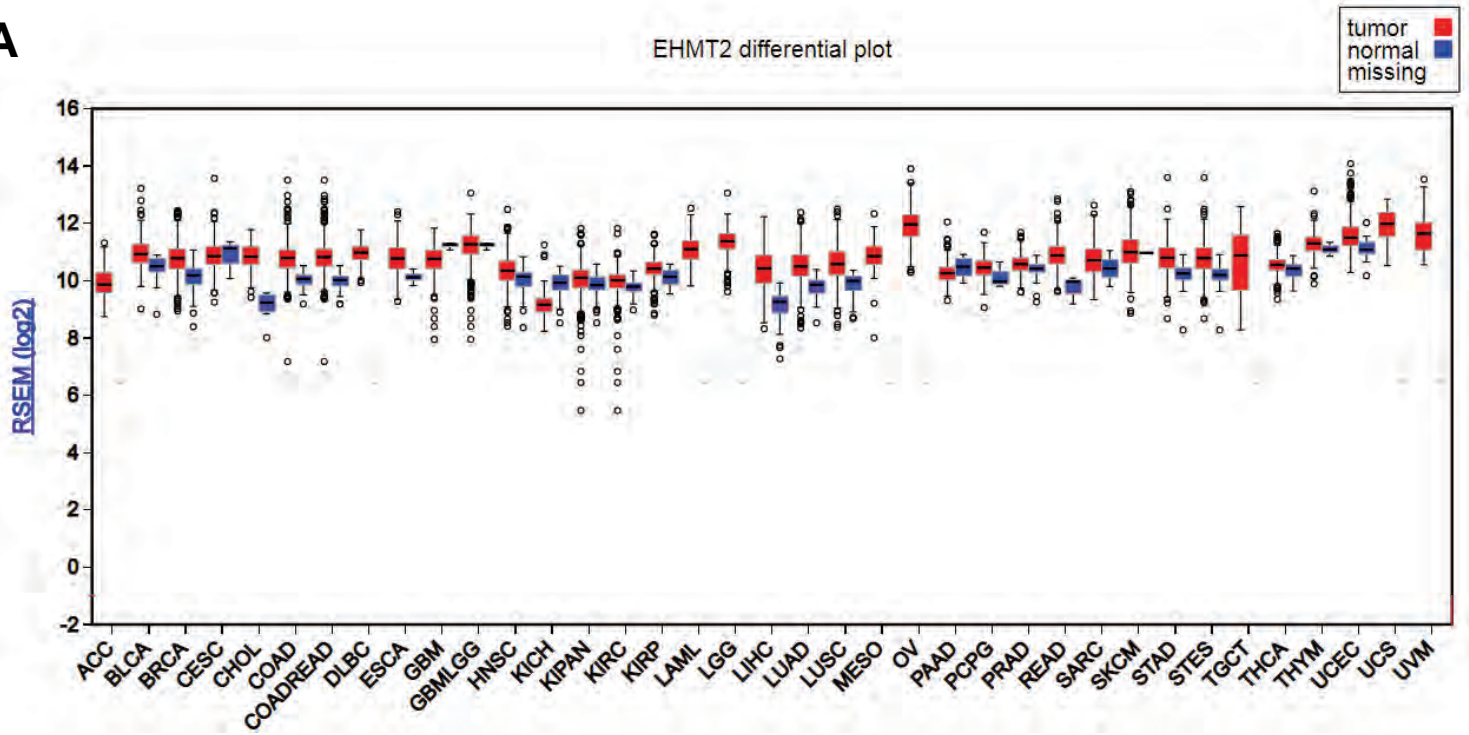**B**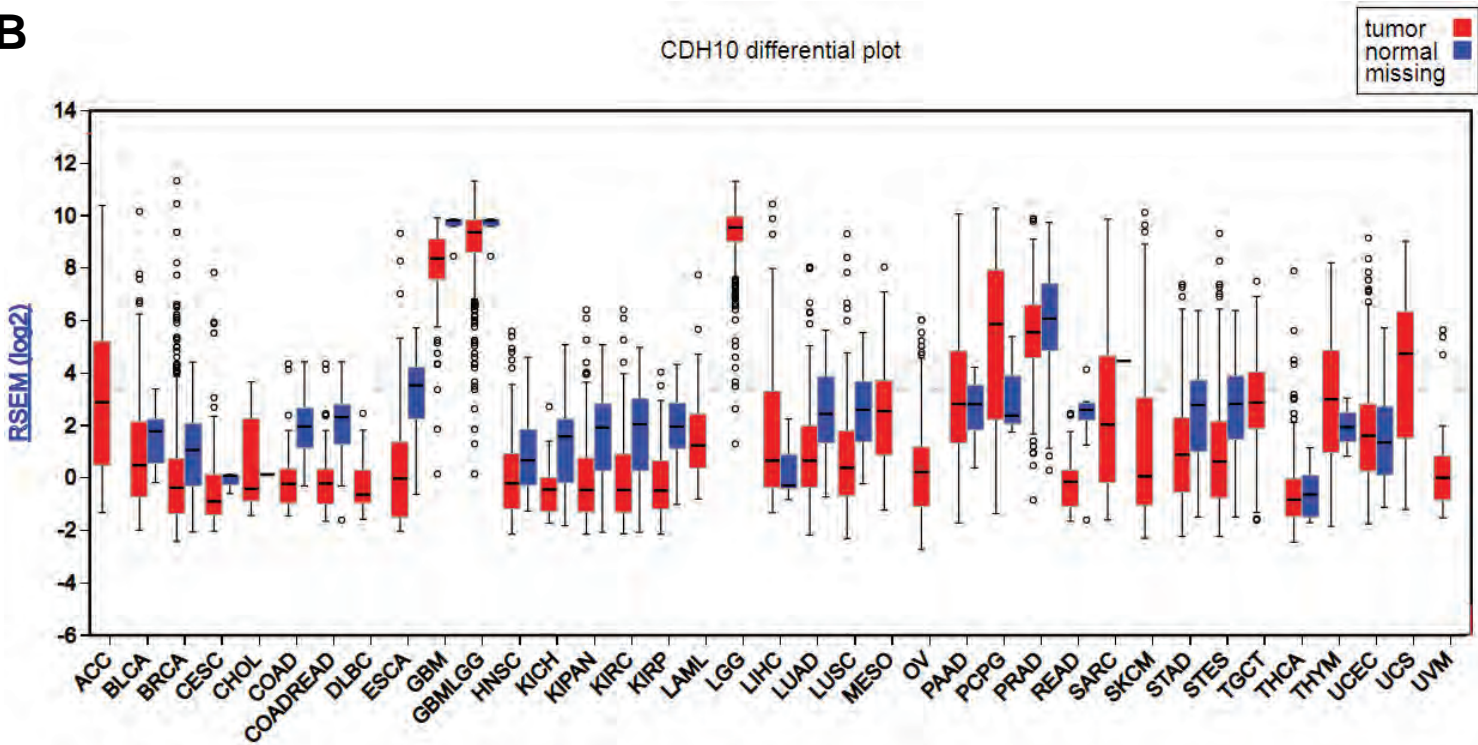

**Figure S8.** (A) TCGA Pan-cancer data comparing the expression levels of *EHMT2* in tumor and normal tissue samples. (B) TCGA Pan-cancer data comparing the expression levels of *CDH10* in tumor and normal tissue samples.



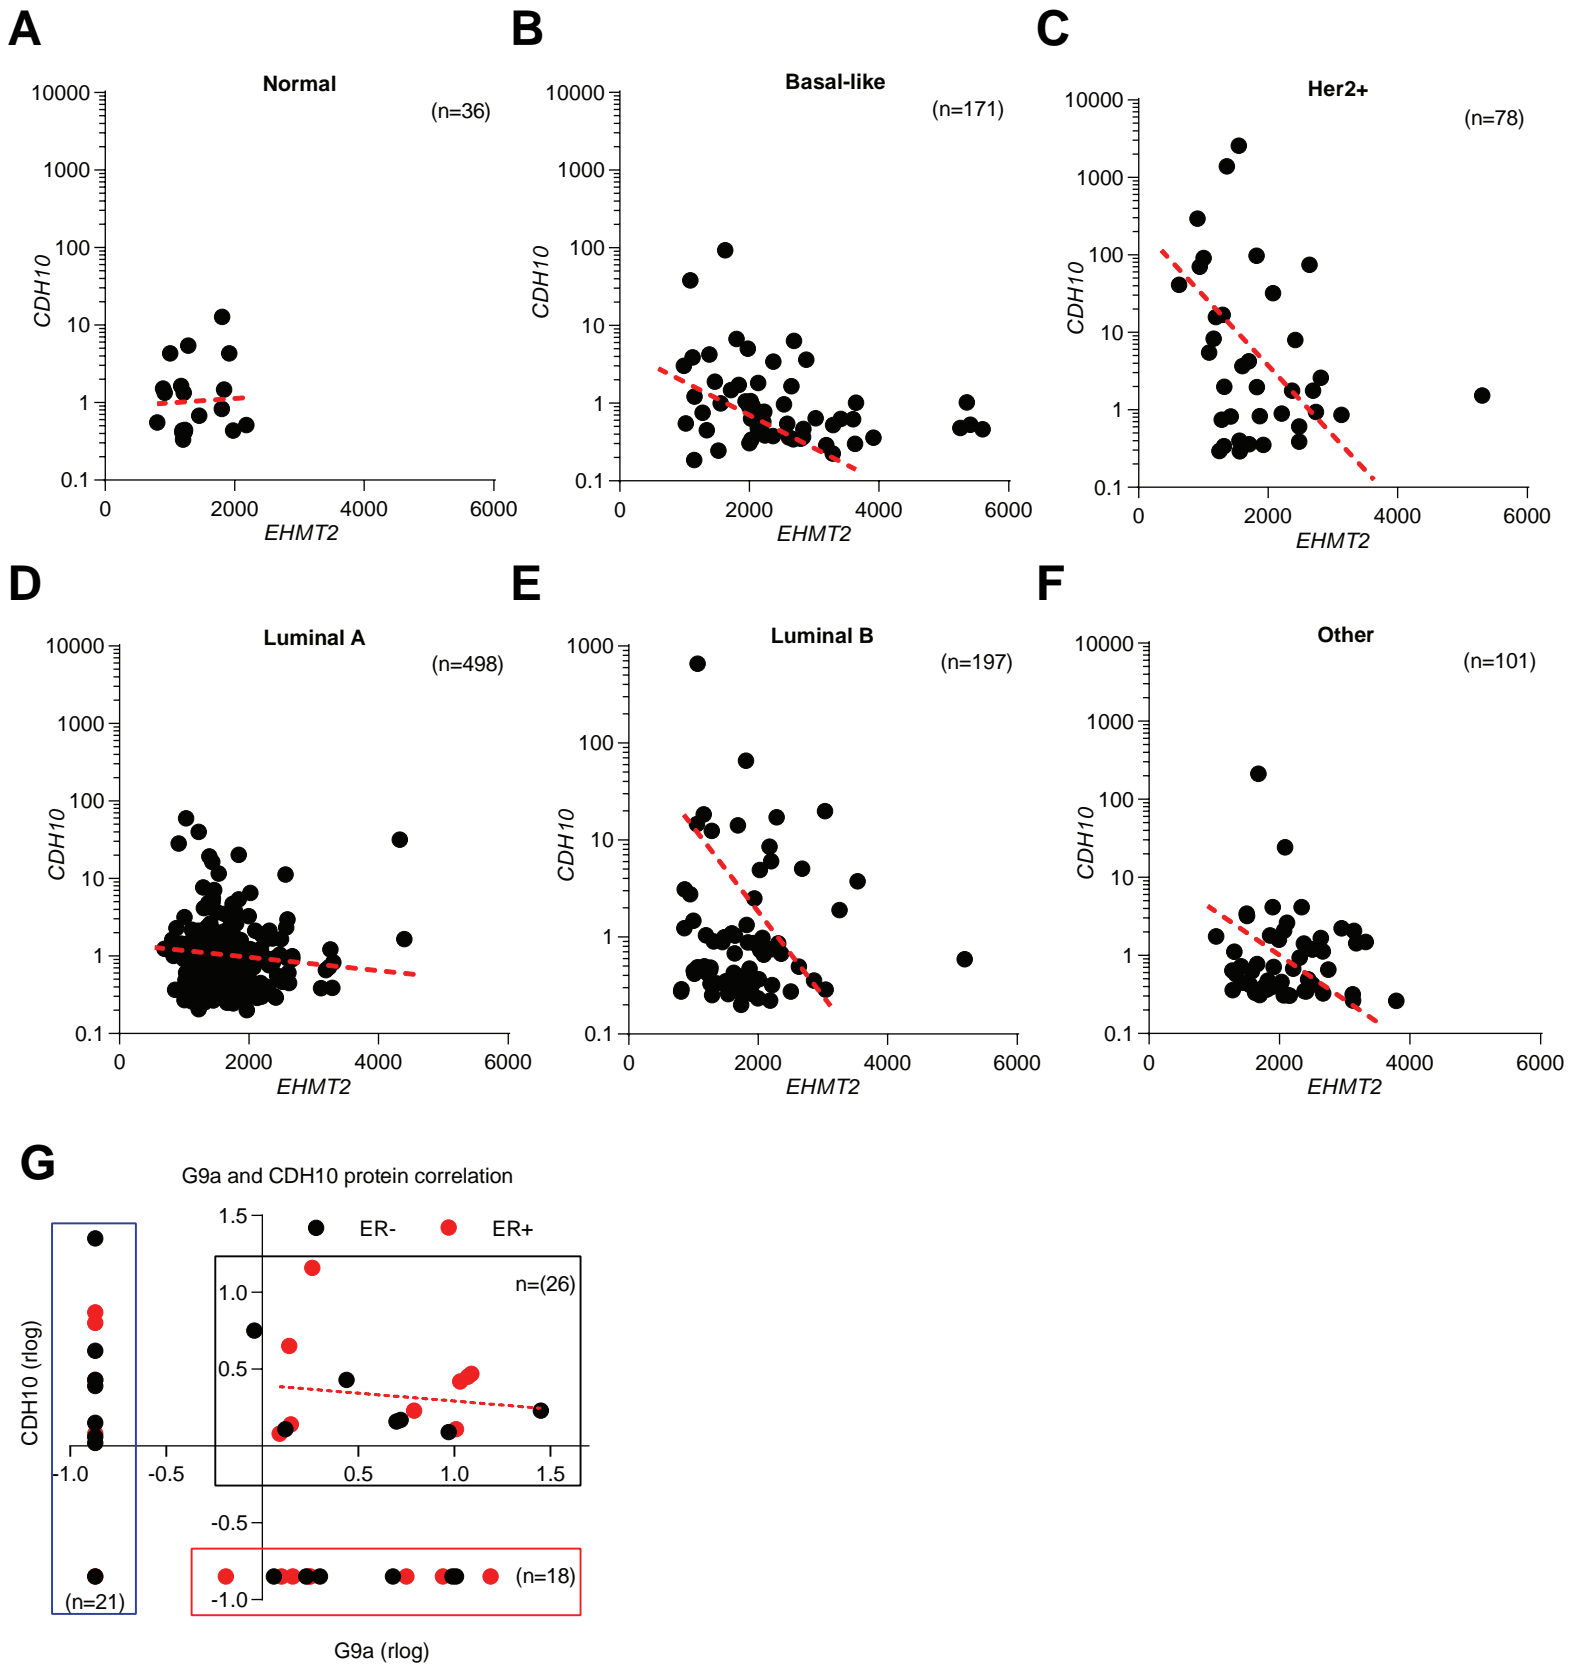

**Figure S9.** Correlation between *CDH10* and *EHMT2* (*G9a*) mRNA levels in (A) normal, (B) basal-like, (C) Her2+, (D) Luminal A, (E) Luminal B and (F) others in patient samples. (G) Correlation between *G9a* and *CDH10* protein levels in breast cancer patients using publicly available databases. Blue square identifies patients with no detectable *G9a*. In the red square are patients with no detectable *CDH10*. In the black square are patients for which both proteins were detectable.

**Table S1.** Table S1: RT-PCR and ChIP primers

| RT-PCR primers  |     |                            |
|-----------------|-----|----------------------------|
| <i>SIGLEC14</i> | FWD | AGGATTTATTCTCCCATCTCGCT    |
|                 | REV | GATGCTGATGGCGAGGTTCTG      |
| <i>IGSF5</i>    | FWD | CGGCGATGGCATCCTTCCTT       |
|                 | REV | GACTCCGACATCTCCTCTTCAGGTAA |
| <i>CDH10</i>    | FWD | GCAGTCCTGTTCTGAGATTG       |
|                 | REV | GCTGGCTTCTGCGAGCACACAGCG   |
| <i>CDH11</i>    | FWD | CCCGCCCCCCCCGCCCCGCAC      |
|                 | REV | CCCGGCCCCAGTCCCGGTCC       |
| <i>HPRT</i>     | FWD | TGACACTGGCAAACAATGCA       |
|                 | REV | GGTCCTTTTCACCAGCAAGCT      |
| <i>VEGF</i>     | FWD | CAGGTCAGAAACCAGCCAG        |
|                 | REV | CGTGATGATTCAAACCTACC       |
| <i>IGFBP3</i>   | FWD | AGAGCACAGATACCCAGAACT      |
|                 | REV | TGAGGAACTTCAGGTGATTCAGT    |
| <i>CEACAM7</i>  | FWD | TCAGCCTGTCCATACAGAGTG      |
|                 | REV | TTGAACGGCACGACATCAATA      |
|                 |     |                            |
| ChIP primers    |     |                            |
| <i>CDH10</i>    | FWD | GCAGTCCTGTTCTGAGATTG       |
|                 | REV | GCTGGCTTCTGCGAGCACACAGCG   |

**Table S2.** Pan-cancer analysis of CDH10 and EHMT2.

| Abbreviation | Tumor type                                                       | N of samples |       |        |       |
|--------------|------------------------------------------------------------------|--------------|-------|--------|-------|
|              |                                                                  | CDH10        |       | EHMT2  |       |
|              |                                                                  | Normal       | Tumor | Normal | Tumor |
| READ         | Rectum adenocarcinoma                                            | 10           | 40    | 10     | 167   |
| COADREAD     | Colorectal adenocarcinoma                                        | 50           | 134   | 51     | 626   |
| COAD         | Colon adenocarcinoma                                             | 40           | 94    | 41     | 459   |
| LUAD         | Lung adenocarcinoma                                              | 52           | 354   | 59     | 517   |
| LUSC         | Lung squamous cell carcinoma                                     | 49           | 321   | 51     | 501   |
| BRCA         | Breast invasive carcinoma                                        | 89           | 469   | 112    | 1100  |
| STES         | Stomach and Esophageal carcinoma                                 | 39           | 329   | 46     | 600   |
| UCEC         | Uterine Corpus Endometrial Carcinoma                             | 29           | 359   | 35     | 546   |
| KIRP         | Kidney renal papillary cell carcinoma                            | 28           | 79    | 32     | 291   |
| KIRC         | Kidney renal clear cell carcinoma                                | 59           | 252   | 72     | 534   |
| HNSC         | Head and Neck squamous cell carcinoma                            | 32           | 180   | 44     | 522   |
| PRAD         | Prostate adenocarcinoma                                          | 51           | 495   | 52     | 498   |
| THYM         | Thymoma                                                          | 2            | 100   | 2      | 120   |
| GBMLGG       | Glioma                                                           | 5            | 695   | 5      | 696   |
| CESC         | Cervical squamous cell carcinoma and endocervical adenocarcinoma | 3            | 67    | 3      | 306   |
| GBM          | Glioblastoma multiforme                                          | 5            | 166   | 5      | 166   |
| KICH         | Kidney Chromophobe                                               | 20           | 24    | 25     | 66    |
